# Supplementary material for: Development and comprehensive analysis of spatially resolved technological high resolution (0.1°×0.1°) Emission Inventory of Particulate Matter for India: A step Towards Air Quality Mitigation
Source: Copernicus journal article supplement (doi:10.5194/essd-2023-310), 2023-10-05
Supplement: Supplementary file [file essd-2023-310-AC2-supplement.pdf]

**Supplement Material of**  
**Development and analysis of spatially resolved technological high resolution (0.1°×0.1°)**  
**Emission Inventory of Particulate Matter for India: A step Towards Air Quality Mitigation**

**Saroj Kumar Sahu<sup>1</sup>, Poonam Mangaraj<sup>1,4</sup>, Gufran Beig<sup>2</sup>, Marianne T. Lund<sup>3</sup>, Bjørn Hallvard Samset<sup>3</sup>, Pallavi Sahoo<sup>1</sup>, Ashirbad Mishra<sup>1</sup>**

<sup>1</sup>Environmental Science, Department of Botany, Utkal University, Bhubaneswar, India

<sup>2</sup>National Institute of Advanced Studies, Indian Institute of Science-Campus, Bangalore, India

<sup>3</sup>CICERO Center for International Climate Research, Oslo, Norway

<sup>4</sup>Research Institute for Humanities and Nature, Kyoto, Japan

Correspondence to: Saroj Kumar Sahu ([saroj.bot@utkaluniversity.ac.in](mailto:saroj.bot@utkaluniversity.ac.in)); Poonam Mangaraj ([poonammangaraj92@gmail.com](mailto:poonammangaraj92@gmail.com)), Gufran Beig ([beig@nias.res.in](mailto:beig@nias.res.in))

**Table S1: Sources of sector-specific activity data**

| Sl. No. | IPCC 2006 code | Sector               | Source                                                                                                                                                                                                                                                                                                                                             |
|---------|----------------|----------------------|----------------------------------------------------------------------------------------------------------------------------------------------------------------------------------------------------------------------------------------------------------------------------------------------------------------------------------------------------|
| 1       | 1.A.3          | Transport            | Ministry of Road Transport & Highway<br><a href="https://morth.nic.in/">https://morth.nic.in/</a><br>Ministry of Statistics and Programme Implementation<br><a href="https://www.mospi.gov.in/">https://www.mospi.gov.in/</a>                                                                                                                      |
| 2       | EPA AP-42*     | Wind-blown Road Dust | Ministry of Road Transport & Highway<br><a href="https://morth.nic.in/">https://morth.nic.in/</a><br>Indian Metrological Department's (IMD)<br><a href="https://mausam.imd.gov.in/">https://mausam.imd.gov.in/</a>                                                                                                                                 |
| 3       | 1.A.2          | Industry             | Ministry of Petroleum and Natural Gas<br><a href="https://petroleum.nic.in/">https://petroleum.nic.in/</a><br>Ministry of Micro, Small & Medium Enterprises<br><a href="https://msme.gov.in/">https://msme.gov.in/</a><br>Ministry of Statistics and Programme Implementation<br><a href="https://www.mospi.gov.in/">https://www.mospi.gov.in/</a> |
| 4       | 1.A.1          | Thermal Power Plant  | Ministry of Power<br><a href="https://powermin.gov.in/">https://powermin.gov.in/</a><br>Central Electricity Authority<br><a href="https://cea.nic.in/?lang=en">https://cea.nic.in/?lang=en</a>                                                                                                                                                     |
| 5       | 1.A.4.b        | Residential and Slum | Census of India<br><a href="https://censusindia.gov.in/census.website/">https://censusindia.gov.in/census.website/</a>                                                                                                                                                                                                                             |

|    |         |                                          |                                                                                                                                                                                                                                                                                                                                                                                   |
|----|---------|------------------------------------------|-----------------------------------------------------------------------------------------------------------------------------------------------------------------------------------------------------------------------------------------------------------------------------------------------------------------------------------------------------------------------------------|
|    |         |                                          | <p>Ministry of Housing and Urban Affairs<br/> <a href="https://mohua.gov.in/">https://mohua.gov.in/</a><br/> UN World Urbanization Prospects<br/> <a href="https://population.un.org/wup/">https://population.un.org/wup/</a></p>                                                                                                                                                 |
| 7  | 1.A.4.a | Street Vendor                            | <p>India's Street Vending (Protection of Livelihood and Regulation of Street Vending) Act<br/> <a href="https://mohua.gov.in/upload/uploadfiles/files/StreetVendorAct2014">https://mohua.gov.in/upload/uploadfiles/files/StreetVendorAct2014</a></p>                                                                                                                              |
| 8  | 3.C.1.b | Crop Residue Burning                     | <p>Ministry of Agriculture &amp; Farmers' Welfare<br/> <a href="https://agricoop.gov.in/">https://agricoop.gov.in/</a><br/> Ministry of Statistics and Programme Implementation<br/> <a href="https://www.mospi.gov.in/">https://www.mospi.gov.in/</a></p>                                                                                                                        |
| 9  | 1.B.1   | Crematorium                              | <p>Ministry of Home Affairs<br/> <a href="https://www.mha.gov.in/en">https://www.mha.gov.in/en</a><br/> SAFAR- Delhi (2018), Pune (2020)</p>                                                                                                                                                                                                                                      |
| 10 |         | Diesel Generator                         | <p>International Energy Agency<br/> <a href="https://www.iea.org/">https://www.iea.org/</a><br/> Department of Telecommunication<br/> <a href="https://dot.gov.in/">https://dot.gov.in/</a></p>                                                                                                                                                                                   |
| 11 | 4.C.2   | Municipal Solid Waste                    | <p>Central Pollution Control Board<br/> <a href="https://cpcb.nic.in/">https://cpcb.nic.in/</a></p>                                                                                                                                                                                                                                                                               |
| 12 | 4.C.1   | Municipal Solid Waste Incineration Plant | <p>Central Pollution Control Board<br/> <a href="https://cpcb.nic.in/">https://cpcb.nic.in/</a></p>                                                                                                                                                                                                                                                                               |
| 13 | 1.B.1   | Brick Kiln                               | <p>Central Pollution Control Board<br/> <a href="https://cpcb.nic.in/">https://cpcb.nic.in/</a><br/> Seay et al., (2021)<br/> <a href="https://doi.org/10.1088/2515-7620/ac0a66">https://doi.org/10.1088/2515-7620/ac0a66</a><br/> Rajaratnam et al., (2014)<br/> <a href="https://doi.org/10.1016/j.atmosenv.2014.08.075">https://doi.org/10.1016/j.atmosenv.2014.08.075</a></p> |
| 14 |         | Cow Dung (Biofuel)                       | <p>SAFAR- Delhi (2018), Pune (2020)</p>                                                                                                                                                                                                                                                                                                                                           |
| 16 | 2.B.9.b | Incense stick/ Mosquito coil/ Cigarette  | <p>Cohen et al., (2013)<br/> <a href="https://doi.org/10.1016/j.scitotenv.2013.03.101">https://doi.org/10.1016/j.scitotenv.2013.03.101</a><br/> Kumar et al., (2014)<br/> <a href="http://dx.doi.org/10.4103/0972-6691.140770">http://dx.doi.org/10.4103/0972-6691.140770</a></p>                                                                                                 |
| 17 | 1.A.2.k | Construction Activity                    | <p>Central Pollution Control Board<br/> <a href="https://cpcb.nic.in/">https://cpcb.nic.in/</a></p>                                                                                                                                                                                                                                                                               |

**Table S2: Technological Emission factors used for transport sector.**

| Transport | 2W<br>(Gasoline) | 3W 2S<br>(CNG) | 3W 4S<br>(Gasoline) | Buses<br>(Diesel) | P Cars<br>(Petrol) | C Cars<br>(CNG) | C Cars<br>(Diesel) | HCV<br>(Diesel) | LCV<br>(Diesel) | MSLV<br>(Diesel) |
|-----------|------------------|----------------|---------------------|-------------------|--------------------|-----------------|--------------------|-----------------|-----------------|------------------|
| 5yr       | 0.015            | 0.118          | 0.015               | 0.795             | 0.002              | 0.001           | 0.015              | 1.24            | 0.475           | 1.24             |
| 10yr      | 0.035            | 0.118          | 0.011               | 1.213             | 0.005              | 0.002           | 0.125              | 1.965           | 0.655           | 1.965            |
| 15yr      | 0.035            | 0.118          | 0.011               | 1.213             | 0.008              | 0.002           | 0.163              | 1.965           | 0.655           | 1.965            |

(Source: ARAI, Air Quality Monitoring Project-Indian Clean Air Program, 2007 report/ CPCB 2010 Report/Sahu et al (2011))

Where; 2W – Two wheelers, 3W- Three Wheelers (2S- Two Stroke, 3S- Three Stroke), P Cars- Personal Cars, C Cars- Commercial Cars, HCV- Heavy Commercial Vehicle, LCV- Light Commercial Vehicle, MSLV- Miscellaneous Vehicles)

**Table S3: Technological emission factors for all other sectors.**

| Sector                        | Fuel                                      | PM <sub>2.5</sub> (g/kg) | PM <sub>10</sub> (g/kg) | Sources               |
|-------------------------------|-------------------------------------------|--------------------------|-------------------------|-----------------------|
| Power Plant                   | Coal/Lignite                              | 0.6                      | 2.3                     | Sahu et al.2017       |
| Industry                      | Coal/Coke                                 | 1.84                     | 2.925                   | Beig et al. 2018      |
| Residential                   | LPG                                       | 0.33                     | 2.1                     | Reddy et al. 2002     |
|                               | Wood                                      | 12.24                    | 15.3                    |                       |
|                               | Coal                                      | 12.2                     | 20                      |                       |
|                               | Kerosene                                  | 1.9                      | 1.95                    |                       |
|                               | Cow-dung                                  | 5.04                     | 6.3                     |                       |
| Crop Residue                  | Rice                                      | 8.3                      | 9.1                     | Khaiwal et al. 2019   |
|                               | Wheat                                     | 7.6                      | 8.36                    | Khaiwal et al. 2019   |
|                               | Sugarcane                                 | 3.8                      | 8.05                    | Khaiwal et al. 2019   |
|                               | Cotton                                    | 5.9                      | 10.85                   | Khaiwal et al. 2019   |
|                               | Coarse Cereals                            | 4.1                      | 4.3                     | Zhang et al. 2018     |
|                               | Mustard                                   | 7.8                      | 8.58                    | Beig et al. 2018      |
|                               | Groundnut                                 | 7.9                      | 8.69                    | Beig et al. 2018      |
|                               | Maize                                     | 7.9                      | 8.69                    | Beig et al. 2018      |
| Bio-Fuel (Cow Dung Cake)      | Cow-dung                                  | 5.04                     | 6.3                     | Reddy et al. 2002     |
|                               | Wood                                      | 12.24                    | 15.3                    | Reddy et al. 2002     |
| Construction*                 | Demolition and Debris Removal - Buldozing | NA                       | 0.75                    | EMEP/EEA Report, 2016 |
| Municipal Solid-waste Burning | NA                                        | 13                       | 14                      | Sharma et al. 2019    |

|                                                       |           |        |        |                                                |
|-------------------------------------------------------|-----------|--------|--------|------------------------------------------------|
| Municipal Solid-waste Incineration Plant <sup>@</sup> | NA        | 18.3   | NA     | Emission Inventory Guidebook 1 September, 1999 |
| Brick Kiln                                            | Coal      | 12.2   | 20     | Reddy et al. 2002                              |
|                                                       | Biomass   | 7.931  | 8.713  | Reddy et al. 2002                              |
|                                                       | Rubber    | 24.48  | NA     | Beig et al. 2018                               |
| Diesel Generator Set <sup>#</sup>                     | Diesel    | 7.2    | 9      | Beig et al. 2018                               |
| Incense sticks                                        | Biomass   | 7.931  | 8.713  | Beig et al. 2018                               |
|                                                       | Charcoal  | 12.2   | 20     | Reddy et al. 2002                              |
|                                                       | Resin     | 33.95  | 39.95  | Cohen et al. 2013                              |
|                                                       | Bakhoor   | 153.72 | 180.85 | Cohen et al. 2013                              |
| Mosquito Coils                                        | Biomass   | 7.931  | 8.713  | Beig et al. 2018                               |
|                                                       | Charcoal  | 12.2   | 20     | Reddy et al. 2002                              |
|                                                       | Wood Dust | 12.24  | 15.3   | Reddy et al. 2002                              |
| Cigarettes                                            | Tobacco   | 21.6   | 27     | EMEP/EEA Report, 2016                          |
| Crematory                                             | Wood      | 12.24  | 15.3   | Reddy et al. 2002                              |

Units- \*lb/ton, @kg/ton, #g/KW-h
